# Supplementary material for: Sodium 4-styrenesulfonyl(trifluoromethanesulfonyl)imide-based single-ion conducting polymer electrolyte incorporating molecular transporters for quasi-solid-state sodium batteries
Source: Royal Society of Chemistry journal article supplement (doi:10.1039/d4ta02329c), 2024-01-01
Supplement: d4ta02329c1.pdf [file d4ta02329c1.pdf]

# Sodium 4-styrenesulfonyl(trifluoromethylsulfonyl) imide-based Single-Ion Conducting Polymer Electrolyte Incorporating Molecular Transporters for Quasi-Solid-State Sodium Batteries

Clemens Wunder<sup>1,2</sup>, Thanh-Loan Lai<sup>3,4</sup>, Edina Šić<sup>5</sup>, Torsten Gutmann<sup>5</sup>, Eric De Vito<sup>3,4</sup>, Gerd Buntkowsky<sup>5</sup>, Maider Zarrabeitia<sup>1,2\*</sup>, Stefano Passerini<sup>1,2\*</sup>

<sup>1</sup> Helmholtz Institute Ulm (HIU), Helmholtzstrasse 11, D-89081 Ulm, Germany

<sup>2</sup> Karlsruhe Institute of Technology (KIT), P.O. Box 3640, D-76021 Karlsruhe, Germany

<sup>3</sup> University Grenoble Alpes, F-38054 Grenoble, France

<sup>4</sup> CEA, LITEN, F-38054 Grenoble, France

<sup>5</sup> Technical University of Darmstadt, Institute for Inorganic and Physical Chemistry, Peter-Grünberg-Straße 8, D-64287 Darmstadt, Germany

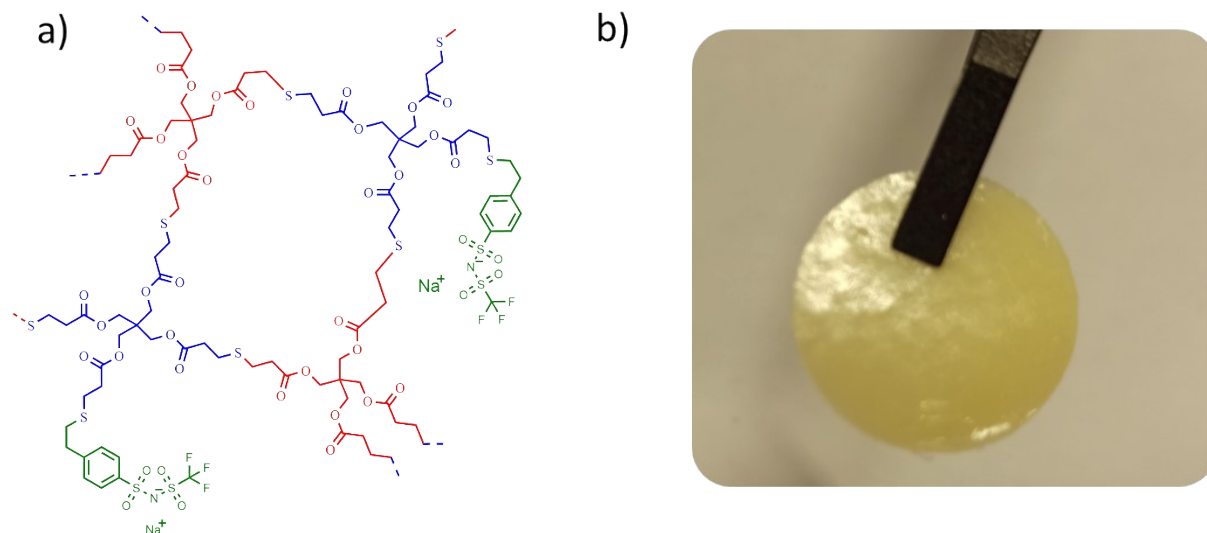

Figure S1. a) Cross-linked structure (NaSTFSI in green, PETMP in blue, and PET4A in red) and b) self-standing SIPE membrane images of NaSTFSI-co-PET-MP/4A.

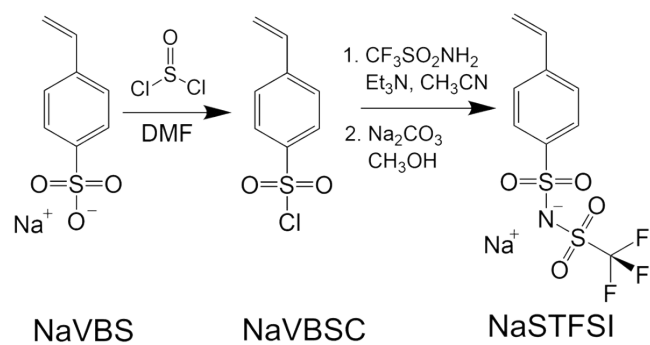

Figure S2. Scheme of a two-step synthesis route for sodium 4-styrene sulfonyl (trifluoromethyl sulfonyl) imide.

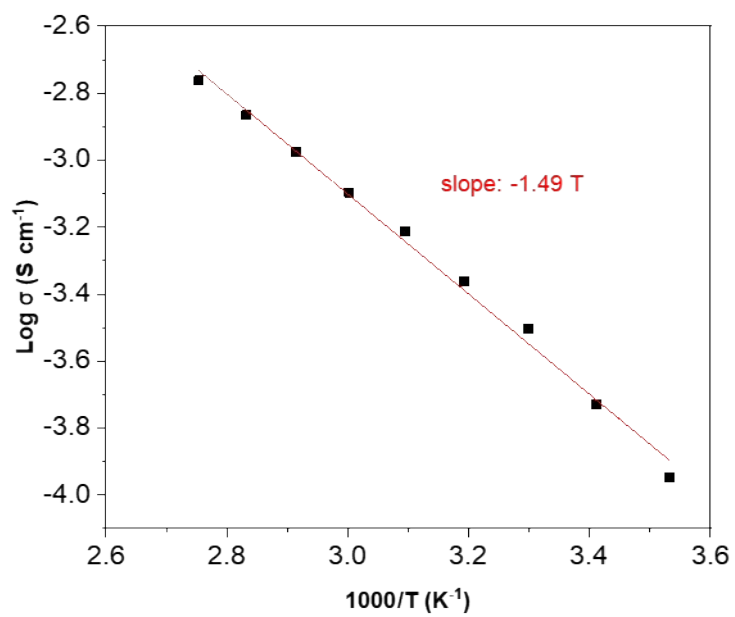

Figure S3. The logarithmic plot of the conductivity vs.  $1000/T$ . The obtained slope is  $-1.49 \text{ T}$ , which can be multiplied with  $-8.6 \cdot 10^{-5} \text{ eV T}^{-1}$ , resulting in an activation energy of  $0.13 \text{ eV}$ .

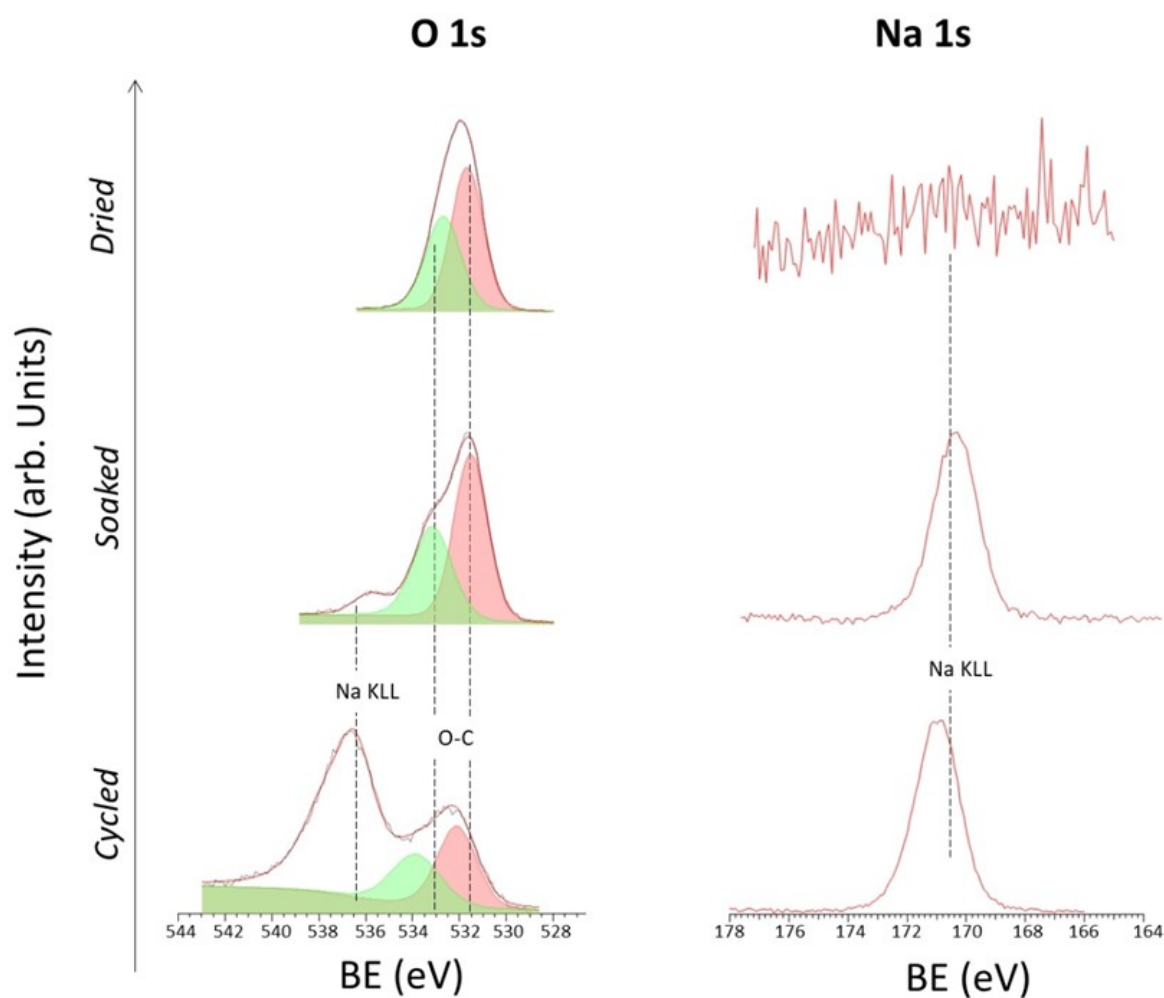

Figure S4. *Ex-situ* XPS spectra of O 1s and Na 1s of NaSTFSI-co-PET-MP/4A electrolyte surface after cycling for 5 cycles in a Na | Na symmetric cell under  $10 \mu\text{A cm}^{-2}$ .

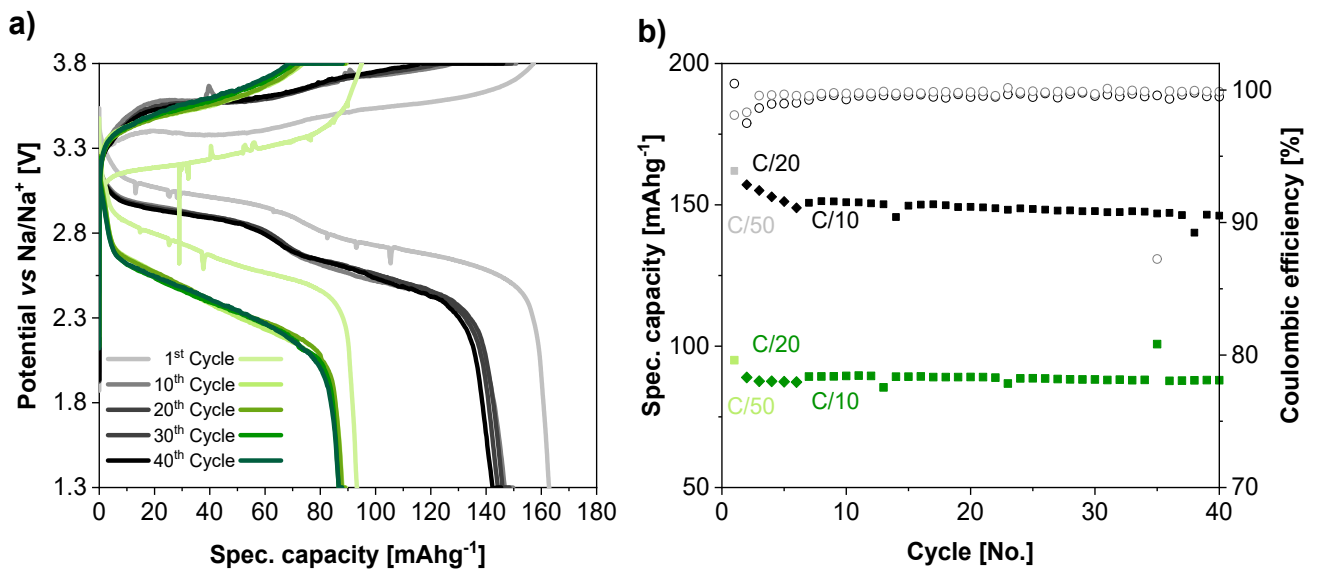

Figure S5. a) Voltage profile and b) cycling performance of hydrated (green) and dehydrated (black) PW cathode using NaSTFSI-co-PET-MP/4A polymer electrolyte at 40 °C.
